# Supplementary material for: The Emergence of Mental Health Self-Direction: An International Learning Exchange
Source: Atypon-hosted journal article supplement (doi:10.1176/appi.ps.201600014), 2016-08-15
Supplement: appi.ps.201600014.ds001.pdf [file appi.ps.201600014.ds001.pdf]

**Online Supplement: International Institute for Mental Health Leadership Learning Exchange  
Participants**

Kristin Ahrens, Temple University Institute on Disabilities  
Vidhya Alakeson, Power to Change, United Kingdom  
Pam Bennett, Utah Department of Human Services, Division of Substance Abuse and Mental Health  
Pat Carver, Community Drive, Inc.  
Ben Cichocki, Human Services Research Institute  
Suzanne Crisp, Boston College National Resource Center for Participant-Directed Services  
Bevin Croft, Human Services Research Institute  
Casey DeLuca, Boston College National Resource Center for Participant-Directed Services  
Gayle Dicesare, River Valley Behavioral Health, Kentucky  
Michele Dirst, Burness Communications  
Carl Falconer, Lutheran Services Florida Health Systems  
Marie Fox, Open Minds Australia  
Charlie Gavigan, Social Care Ideas Factory, Scotland  
Briana Gilmore, Community Access, New York  
Susan Hallwright, Hallwright Consulting, New Zealand  
Susan Hardie, Canadian Centre on Disability Studies  
Patrick Hendry, Mental Health America, Virginia  
David Hughes, Human Services Research Institute  
Kenneth Jue, United States Representative, International Initiative for Mental Health Leadership  
Racheal Kane, Texas Department of State Health Services, Mental Health and Substance Abuse Division  
Kevin Mahoney, Boston College National Resource Center for Participant-Directed Services  
Erme Maula, Mental Health Association of Southeastern Pennsylvania  
Deborah Monroe, Recovery Concepts, Michigan  
Jessie Morris, Salt Lake County Behavioral Health Services  
Yeong-min Mun, Seoul Center for Independent Living  
Chano Park, Seoul Center for Independent Living  
David Sarchet, NAMI Florida Self-Directed Care  
Anne Skordis, National Disability Insurance Agency, Australia  
Lisa St. George, RI International, Arizona  
Dena Stoner, Texas Department of State Health Services, Mental Health and Substance Abuse Division  
Tison Thomas, U.S. Department of Health and Human Services, Substance Abuse and Mental Health Services Administration  
Kaipeng Wang, Boston College National Resource Center for Participant-Directed Services  
Andy Warren, Together for Mental Well Being, United Kingdom  
Anne Weaver, Human Services Research Institute  
Pamela Werner, Michigan Department of Health and Human Services Office of Recovery-Oriented Systems of Care  
Chris White, Mental Health Foundation, Scotland  
Donald Zalucki, New York Office of Mental Health Bureau of Program and Policy Development

**Online Supplement : Self-Direction Efforts Represented at the International Institute for Mental Health Leadership Learning Exchange**

| Country or U.S. State | Name, Dates Active, Website                                                                                                                                                                          | Eligibility Criteria                                                                                                                                                                                                                                                                   | Budget Setting & Scope                                                                                                                                                                                                                                                                                                                                                                                                 | Role of Peers                                                                                                                                                                                                                                                                                                                                      | Funding                                                                                                                                                                                                                                                                                                                   | Planning Approach                                                                                                                                                                                            |
|-----------------------|------------------------------------------------------------------------------------------------------------------------------------------------------------------------------------------------------|----------------------------------------------------------------------------------------------------------------------------------------------------------------------------------------------------------------------------------------------------------------------------------------|------------------------------------------------------------------------------------------------------------------------------------------------------------------------------------------------------------------------------------------------------------------------------------------------------------------------------------------------------------------------------------------------------------------------|----------------------------------------------------------------------------------------------------------------------------------------------------------------------------------------------------------------------------------------------------------------------------------------------------------------------------------------------------|---------------------------------------------------------------------------------------------------------------------------------------------------------------------------------------------------------------------------------------------------------------------------------------------------------------------------|--------------------------------------------------------------------------------------------------------------------------------------------------------------------------------------------------------------|
| England               | <p>Personal Health Budgets</p> <p>Piloted between 2009 and 2012 with wider rollout from April 2015</p> <p><a href="http://www.england.nhs.uk/healthbudgets">www.england.nhs.uk/healthbudgets</a></p> | <p>Individuals with long term conditions, but exact eligibility is decided locally</p>                                                                                                                                                                                                 | <ul style="list-style-type: none"> <li>Excludes inpatient or crisis care, but can include clinical services</li> <li>Budget-setting varies by site</li> <li>Nationally excluded items: alcohol, cigarettes, gambling, illegal drugs and debt repayment. Local areas can set additional criteria</li> <li>Budgets paid directly to the individual, to a third party, or the local commissioning organization</li> </ul> | <ul style="list-style-type: none"> <li>A national peer network informed the pilot and subsequent national policy</li> <li>Where established, local peer networks can provide feedback on the development of personal health budgets</li> <li>Many local areas use user-led organizations to provide brokerage and care planning support</li> </ul> | <p>National Health Service funds via local authorities using a combination of reappropriating existing spending (in the case of fee-for-service services) and providing additional funds when they cannot be reappropriated (in the case of services and supports that are block-purchased based on expected volume).</p> | <ul style="list-style-type: none"> <li>No single approach to planning</li> <li>A spending plan is developed based on the plan, and a clinical professional and finance professional both sign off</li> </ul> |
| England               | <p>Integrated Personal Commissioning Programme</p> <p>2014 – 2019</p> <p><a href="http://www.england.nhs.uk/commissioning/ipc">www.england.nhs.uk/commissioning/ipc</a></p>                          | <p>Eligibility varies by site, involving children and young people with complex needs; people with multiple long-term conditions; people with learning disabilities with high support needs; and people with significant mental health needs who use high levels of unplanned care</p> | <ul style="list-style-type: none"> <li>Guidelines are the same as for Personal Health Budgets</li> <li>Integrates social care and health budgets so that participants have one single personal budget</li> </ul>                                                                                                                                                                                                       | <p>Varies by site</p>                                                                                                                                                                                                                                                                                                                              | <p>Trying to develop new approaches to funding, such as capitated budgets, which will allow personal health budgets to be funded from within existing National Health Service spending</p>                                                                                                                                | <ul style="list-style-type: none"> <li>Intended to be a central feature for creating more personalized care</li> <li>No single approach is prescribed</li> </ul>                                             |

| Country or U.S. State | Name, Dates Active, Website                                                                                                                                                                | Eligibility Criteria                                                                                                                                                 | Budget Setting & Scope                                                                                                                                                                                                                                                                                                                                                       | Role of Peers                                                                                                                                                     | Funding                                                                                | Planning Approach                                                                                                                                                 |
|-----------------------|--------------------------------------------------------------------------------------------------------------------------------------------------------------------------------------------|----------------------------------------------------------------------------------------------------------------------------------------------------------------------|------------------------------------------------------------------------------------------------------------------------------------------------------------------------------------------------------------------------------------------------------------------------------------------------------------------------------------------------------------------------------|-------------------------------------------------------------------------------------------------------------------------------------------------------------------|----------------------------------------------------------------------------------------|-------------------------------------------------------------------------------------------------------------------------------------------------------------------|
| Australia             | National Disability Insurance Scheme (NDIS)<br><br>2013 to present<br><br><a href="http://www.ndis.gov.au">www.ndis.gov.au</a>                                                             | Legislation indicates age, residence, disability, and early intervention requirements.                                                                               | Budgets required to be “reasonable and necessary” in accordance with legislation and use of NDIS funds prescribed within NDIS rules                                                                                                                                                                                                                                          | None specified                                                                                                                                                    | Federal funding allocated as individual budgets                                        | Legislation indicates options for participant plan management                                                                                                     |
| Scotland              | Social Care (Self-Directed Support) (Scotland) Act 2013<br><br>2013 to present<br><br><a href="http://www.selfdirectedsupportscotland.org.uk/">www.selfdirectedsupportscotland.org.uk/</a> | People who are eligible for social care are offered a range of choices over how they receive their social care and support                                           | <ul style="list-style-type: none"> <li>• A Resource Allocation System assesses support needs and indicates a personal budget</li> <li>• People can either manage their own budget and supports; choose who provides support with the Local Authority organizing and managing; allow the Local Authority to make all decisions; or use some blend of these options</li> </ul> | None specified, although legislation includes core values of empowerment and principles of co-production, collaboration, involvement and participation.           | Local Authority Funding if eligible for social care                                    | <ul style="list-style-type: none"> <li>• Includes person-centered planning</li> <li>• Varies from organization to organization</li> </ul>                         |
| Florida               | Florida Self-Directed Care (FloridaSDC)<br><br>Circuit 4                                                                                                                                   | <ul style="list-style-type: none"> <li>• Adults age 18 or older with serious and persistent mental illness designation</li> <li>• Additional requirements</li> </ul> | <ul style="list-style-type: none"> <li>• A fixed uniform quarterly budget is used to purchase traditional and non-traditional mental health services and goods</li> </ul>                                                                                                                                                                                                    | <ul style="list-style-type: none"> <li>• Participants compose at least 51% of Advisory Council</li> <li>• Peers have been employed as support brokers,</li> </ul> | State general revenue dollars administered by the managing entity in each program area | <ul style="list-style-type: none"> <li>• Support brokers assist participants in developing a person-centered plan, which is updated every three months</li> </ul> |

| Country or U.S. State | Name, Dates Active, Website                                                                                                                                                                                                                   | Eligibility Criteria                                                                                                   | Budget Setting & Scope                                                                                                                                                            | Role of Peers                                                                                                                                                                                                                                 | Funding                                                                   | Planning Approach                                                                                                                       |
|-----------------------|-----------------------------------------------------------------------------------------------------------------------------------------------------------------------------------------------------------------------------------------------|------------------------------------------------------------------------------------------------------------------------|-----------------------------------------------------------------------------------------------------------------------------------------------------------------------------------|-----------------------------------------------------------------------------------------------------------------------------------------------------------------------------------------------------------------------------------------------|---------------------------------------------------------------------------|-----------------------------------------------------------------------------------------------------------------------------------------|
|                       | FloridaSDC<br>2002 to present<br><a href="http://www.floridafdc.com">http://www.floridafdc.com</a><br>Circuit 20<br>FloridaSDC<br>2005 to present<br><a href="http://www.flfdc.org">http://www.flfdc.org</a>                                  | related to eligibility for public disability benefits, income, legal competency status, and residency in program areas | <ul style="list-style-type: none"> <li>Participants without Medicaid or Medicare receive additional funds that can only be used for traditional mental health services</li> </ul> | but lived experience is not a requirement for position                                                                                                                                                                                        |                                                                           |                                                                                                                                         |
| Michigan              | Self-Determination Arrangements<br><br>2003 to present<br><br><a href="http://www.michigan.gov/mdhhs/0,5885,7-339-71550_2941_4868_4900-264686--,00.html">http://www.michigan.gov/mdhhs/0,5885,7-339-71550_2941_4868_4900-264686--,00.html</a> | Adults age 18 or older funded by Medicaid                                                                              | Budget expenditures must meet the requirements of medical necessity defined as community inclusion and participation, independence and productivity                               | <ul style="list-style-type: none"> <li>Certified Peer Support Specialists serve as Independent Support Brokers</li> <li>Participants have chosen to directly hire peer specialists as part of the person-centered planning process</li> </ul> | Medicaid Managed Care and Specialty Services 1915 (b)(c) Waiver Authority | An Individual Plan of Service is completed with an Independent Support Broker using a person-centered planning process                  |
| New York              | Name to be determined<br><br>Anticipated 2016                                                                                                                                                                                                 | Adults funded by Medicaid with a serious mental illness diagnosis and threshold score on functional assessment         | <ul style="list-style-type: none"> <li>To be determined</li> <li>Budget will likely be based on the home and community-based services included in a Plan of Care</li> </ul>       | Preference for peers to function as a support broker, but not a requirement                                                                                                                                                                   | Medicaid 1115 Waiver Authority                                            | <ul style="list-style-type: none"> <li>A person-centered planning process will be required</li> <li>Training to be developed</li> </ul> |

| Country or U.S. State | Name, Dates Active, Website                                                      | Eligibility Criteria                                                                                                                                                                                                                                                                   | Budget Setting & Scope                                                                                                                                                                                                                                                                                                        | Role of Peers                                                                                                                                                                                                                                                  | Funding                                                                                                                                                                                                  | Planning Approach                                                                                                                                                |
|-----------------------|----------------------------------------------------------------------------------|----------------------------------------------------------------------------------------------------------------------------------------------------------------------------------------------------------------------------------------------------------------------------------------|-------------------------------------------------------------------------------------------------------------------------------------------------------------------------------------------------------------------------------------------------------------------------------------------------------------------------------|----------------------------------------------------------------------------------------------------------------------------------------------------------------------------------------------------------------------------------------------------------------|----------------------------------------------------------------------------------------------------------------------------------------------------------------------------------------------------------|------------------------------------------------------------------------------------------------------------------------------------------------------------------|
| Pennsylvania          | Consumer Recovery Investment Fund (CRIF)<br><br>2009 to present                  | <ul style="list-style-type: none"> <li>Adults aged 18-65 funded by Medicaid with 295 or 296 DSM IV-R diagnoses</li> <li>Additional requirements related to past utilization of behavioral health services, legal competency status, and consent to treatment and evaluation</li> </ul> | <ul style="list-style-type: none"> <li>Budget is based on historical use and includes psychiatric rehabilitation services, Medicaid outpatient mental health services, and approved alternative goods and services</li> <li>Support brokerage funds are drawn from the budget, billed as "Peer Specialist Support"</li> </ul> | Support brokers are trained and certified Peer Specialists specially trained in self-directed care                                                                                                                                                             | Reinvestment funds from a Managed Care Organization, Magellan Behavioral Health of Pennsylvania                                                                                                          | The Recovery Plan is the result of a person-centered process in which goods and services that best meet the consumer's needs, goals and preferences are selected |
| Texas                 | Texas Self-Directed Care Study<br><br>2-year randomized trial, 2009 - 2013       | Adult members of a managed behavioral health plan in the Dallas area with serious mental illness who were receiving traditional mental health outpatient services                                                                                                                      | Annual budget of \$4,000 to \$7,000 per person based on historical service use                                                                                                                                                                                                                                                | <ul style="list-style-type: none"> <li>Peers were involved in project planning and staffing, served on the advisory board, and worked on the research</li> <li>Half of all support brokers were peers</li> <li>Participants purchased peer services</li> </ul> | "Braided" funding sources under the managed care plan included Medicaid dollars, state general revenue, federal transformation grant dollars, federal mental health block grant dollars, and local funds | Participants developed person-centered recovery plans with the assistance of advisors, and individualized budgets were based on the recovery plans               |
| Texas                 | Wellness Incentives and Navigation (WIN) Study<br><br>Randomized trial currently | Adult members of an integrated Medicaid managed care plan in the Harris service delivery area with serious mental illness or with a combination of behavioral and                                                                                                                      | <ul style="list-style-type: none"> <li>Flexible wellness accounts of \$1,150 per person per year enable participants to purchase goods and services not available through the traditional</li> </ul>                                                                                                                          | <ul style="list-style-type: none"> <li>Wellness Recovery Action Planning (WRAP), a peer-led intervention, was offered to all WIN intervention group participants</li> </ul>                                                                                    | Federal Medicaid Incentives for Prevention of Chronic Disease (MIPCD) grant                                                                                                                              | Participants developed person-centered recovery plans with the assistance of health navigators; individualized budgets were based                                |

| Country or U.S. State | Name, Dates Active, Website                                        | Eligibility Criteria                                                                                                                                                                                                                                   | Budget Setting & Scope                                                                                                                                                                                                                                                                                               | Role of Peers                                                                                                                                         | Funding                                                                                                                                                                                                                                                                                                              | Planning Approach                                                                                                                                                                    |
|-----------------------|--------------------------------------------------------------------|--------------------------------------------------------------------------------------------------------------------------------------------------------------------------------------------------------------------------------------------------------|----------------------------------------------------------------------------------------------------------------------------------------------------------------------------------------------------------------------------------------------------------------------------------------------------------------------|-------------------------------------------------------------------------------------------------------------------------------------------------------|----------------------------------------------------------------------------------------------------------------------------------------------------------------------------------------------------------------------------------------------------------------------------------------------------------------------|--------------------------------------------------------------------------------------------------------------------------------------------------------------------------------------|
|                       | underway, 2011 - 2015                                              | chronic physical conditions                                                                                                                                                                                                                            | Medicaid system                                                                                                                                                                                                                                                                                                      | <ul style="list-style-type: none"> <li>Individuals could purchase peer services</li> </ul>                                                            |                                                                                                                                                                                                                                                                                                                      | on their wellness plans                                                                                                                                                              |
| Utah                  | Mental Health – Access to Recovery (MH-ATR)<br><br>2014 to present | <ul style="list-style-type: none"> <li>Medicaid-funded or Unfunded;</li> <li>Income less than \$32,000/year;</li> <li>At least 13 years of age; and</li> <li>located in Salt Lake County (now expanding to other counties around the State)</li> </ul> | <ul style="list-style-type: none"> <li>Fixed budget started at \$1200 and was increased to \$2000 per person</li> <li>Includes traditional mental health and substance abuse treatment services (for unfunded clients), peer support services, and non-traditional goods and services to support recovery</li> </ul> | Peers have formal program role, but state leadership has increasingly emphasized the importance of peer roles throughout the behavioral health system | <ul style="list-style-type: none"> <li>Initial funding from the SAMHSA Transformation Transfer Initiative, with additional funding from mental health block grant and Temporary Assistance for Needy Families (TAN-F) funds</li> <li>Funding passed directly through to the local mental health authority</li> </ul> | Participants work with support brokers to identify needs and goals and allocate funds based on those goals                                                                           |
| Virginia              | Social Self Directed Care                                          | Individuals with schizophrenia receiving Assertive Community Treatment (ACT)                                                                                                                                                                           | A small fixed budget per person used for social activities based upon goal setting and action plans                                                                                                                                                                                                                  | All support brokers are Certified Peer Specialists, and the program was designed and implemented by a peer                                            | Grant funding and funds from a trust set up with Mental Health America for schizophrenia research and programming                                                                                                                                                                                                    | Each individual identified social and relationship goals, and developed action plans to achieve those goals, and then created a budget with assistance of a support broker as needed |
